# Supplementary material
Source: PubMed Central journal article supplement (PMC2760839)
Supplement: NIHMS130453-supplement-supp_mat.pdf [file NIHMS130453-supplement-supp_mat.pdf]

## Cysteine pK<sub>a</sub> Depression by a Protonated Glutamic Acid in Human DJ-1

Anna C. Witt<sup>†</sup>, Mahadevan Lakshminarasimhan<sup>†</sup>, Benjamin C. Remington<sup>†</sup>, Sahar Hasim<sup>†</sup>, Edwin Pozharski<sup>§</sup>, and Mark A. Wilson<sup>†\*</sup>

<sup>†</sup>*Department of Biochemistry and the Redox Biology Center, The University of Nebraska-Lincoln, Lincoln, NE 68588 and* <sup>§</sup>*the Department of Pharmaceutical Sciences, The University of Maryland School of Pharmacy, Baltimore, MD, 21201*

\*To whom correspondence should be addressed

### SUPPORTING INFORMATION

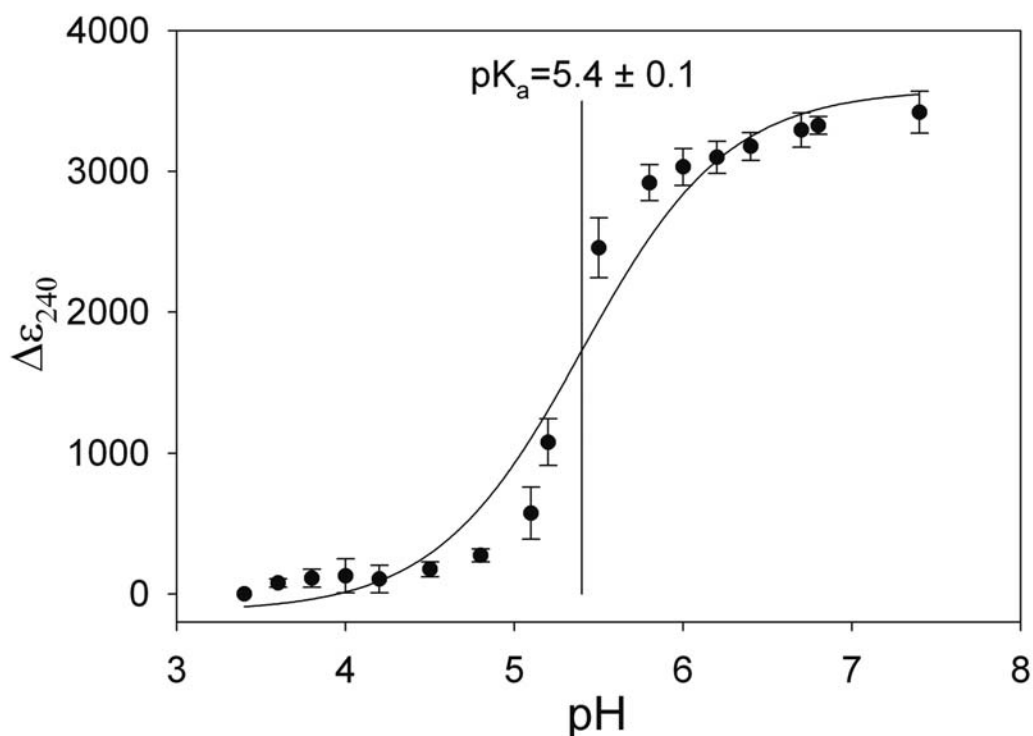

**Figure S1:** C106 pK<sub>a</sub> is unchanged by elevation of ionic strength in the double buffer. The pK<sub>a</sub> of C106 in human DJ-1 was determined by measuring the change in the extinction coefficient at 240 nm ( $\Delta\epsilon_{240}$ ) as a function of pH in 10 mM sodium citrate-sodium phosphate buffer supplemented by 100 mM NaCl. The  $\Delta\epsilon_{240}$  value is calculated by subtraction of the  $\epsilon_{240}$  measured at the lowest pH from all other measured  $\epsilon_{240}$  values. C106 has a pK<sub>a</sub>=5.4±0.1 in this buffer, which is identical to the pK<sub>a</sub> measured in the double buffer alone (Figure 2A). Data were measured in triplicate and the standard deviation about the mean values is indicated with error bars.

| PDB code | atom 1 | res. 1 name | chain | res. 1 no. | atom 2 | res. 2 name | chain | res. 2 no. | atom1-atom2 dist. (Å) | H bond angle | dihedral angle |
|----------|--------|-------------|-------|------------|--------|-------------|-------|------------|-----------------------|--------------|----------------|
| 1A4M     | SG     | CYS         | A     | 153        | OD2    | ASP         | A     | 181        | 3.52                  | 117.40       | -161.30        |
| 1A4M     | SG     | CYS         | B     | 653        | OD2    | ASP         | B     | 681        | 3.45                  | 120.30       | -164.70        |
| 1A4M     | SG     | CYS         | C     | 1153       | OD2    | ASP         | C     | 1181       | 3.30                  | 123.30       | -171.20        |
| 1ABR     | SG     | CYS         | A     | 247        | OE2    | GLU         | A     | 207        | 3.85                  | 103.40       | -172.50        |
| 1AHO     | SG     | BCYS        | A     | 12         | OD1    | ASP         | A     | 8          | 3.64                  | 105.30       | 17.60          |
| 1AJ8     | SG     | CYS         | A     | 21         | OE2    | GLU         | A     | 187        | 3.71                  | 110.30       | -160.80        |
| 1AJ8     | SG     | CYS         | B     | 21         | OE2    | GLU         | B     | 187        | 3.82                  | 108.90       | -168.80        |
| 1B5L     | SG     | CYS         | A     | 29         | OE1    | GLU         | A     | 142        | 3.95                  | 109.20       | 167.90         |
| 1B7B     | SG     | CYS         | B     | 235        | OE2    | GLU         | B     | 243        | 3.54                  | 95.10        | 170.40         |
| 1BX7     | SG     | CYS         | A     | 44         | OD1    | ASP         | A     | 40         | 3.97                  | 105.60       | 20.00          |
| 1C6V     | SG     | CYS         | A     | 65         | OE1    | GLU         | A     | 92         | 3.30                  | 106.10       | -163.70        |
| 1D2E     | SG     | CYS         | A     | 222        | OD2    | ASP         | A     | 228        | 3.41                  | 117.10       | -170.90        |
| 1D2E     | SG     | CYS         | C     | 222        | OD2    | ASP         | C     | 228        | 3.49                  | 118.30       | 172.00         |
| 1DYO     | SG     | CYS         | A     | 89         | OE2    | GLU         | A     | 138        | 3.96                  | 124.10       | 176.50         |
| 1DYO     | SG     | CYS         | B     | 89         | OE2    | GLU         | B     | 138        | 3.99                  | 123.30       | 179.90         |
| 1E5Q     | SG     | CYS         | A     | 155        | OD2    | ASP         | A     | 126        | 3.95                  | 104.70       | 163.30         |
| 1E5Q     | SG     | CYS         | C     | 155        | OD2    | ASP         | C     | 126        | 3.98                  | 105.00       | 170.00         |
| 1E5Q     | SG     | CYS         | D     | 155        | OD2    | ASP         | D     | 126        | 3.96                  | 104.10       | 163.20         |
| 1E5Q     | SG     | CYS         | F     | 155        | OD2    | ASP         | F     | 126        | 3.91                  | 106.50       | 167.90         |
| 1E5Q     | SG     | CYS         | G     | 155        | OD2    | ASP         | G     | 126        | 3.93                  | 105.30       | 165.00         |
| 1E89     | SG     | CYS         | A     | 162        | OD2    | ASP         | A     | 235        | 3.27                  | 122.80       | 5.00           |
| 1EDZ     | SG     | CYS         | A     | 115        | OE1    | GLU         | A     | 117        | 3.44                  | 108.40       | -168.40        |
| 1FE0     | SG     | CYS         | A     | 41         | OD1    | ASP         | A     | 32         | 3.87                  | 104.70       | -17.60         |
| 1FX4     | SG     | CYS         | A     | 959        | OE1    | GLU         | A     | 955        | 3.85                  | 101.60       | -161.00        |
| 1FXZ     | SG     | CYS         | A     | 12         | OE1    | GLU         | A     | 11         | 3.98                  | 117.40       | -179.20        |
| 1G2I     | SG     | CYS         | B     | 300        | OE1    | GLU         | B     | 215        | 3.82                  | 104.80       | 6.70           |
| 1G2I     | SG     | CYS         | C     | 500        | OE1    | GLU         | C     | 415        | 3.90                  | 101.90       | 7.60           |
| 1G2I     | SG     | CYS         | A     | 100        | OE2    | GLU         | A     | 15         | 3.97                  | 102.90       | -8.80          |
| 1G2I     | SG     | CYS         | B     | 300        | OE2    | GLU         | B     | 215        | 3.93                  | 99.10        | -6.30          |
| 1G2I     | SG     | CYS         | C     | 500        | OE2    | GLU         | C     | 415        | 3.89                  | 102.00       | -7.60          |
| 1G8M     | SG     | CYS         | A     | 288        | OE2    | GLU         | A     | 284        | 3.77                  | 118.00       | 169.00         |
| 1G8M     | SG     | CYS         | B     | 288        | OE2    | GLU         | B     | 284        | 3.85                  | 116.90       | 169.80         |
| 1GG4     | SG     | CYS         | B     | 871        | OE2    | GLU         | B     | 867        | 3.42                  | 94.80        | -178.90        |
| 1GXC     | SG     | CYS         | G     | 124        | OD2    | ASP         | G     | 126        | 2.92                  | 119.90       | -163.60        |
| 1GYC     | SG     | CYS         | A     | 117        | OD1    | ASP         | A     | 456        | 3.71                  | 110.20       | 163.20         |
| 1H2B     | SG     | CYS         | A     | 112        | OD1    | ASP         | A     | 109        | 3.85                  | 120.00       | 7.60           |
| 1H2B     | SG     | CYS         | B     | 112        | OD1    | ASP         | B     | 109        | 3.97                  | 122.40       | 12.70          |
| 1HCN     | SG     | CYS         | B     | 26         | OE2    | GLU         | B     | 19         | 3.42                  | 100.30       | -169.80        |
| 1HZ4     | SG     | CYS         | A     | 174        | OE2    | GLU         | A     | 133        | 3.41                  | 115.00       | 169.00         |
| 1IZN     | SG     | CYS         | C     | 157        | OE2    | GLU         | C     | 176        | 3.96                  | 108.10       | 178.60         |
| 1JVB     | SG     | CYS         | A     | 112        | OE2    | GLU         | A     | 98         | 3.49                  | 99.00        | 174.60         |
| 1JVN     | SG     | CYS         | B     | 470        | OD2    | ASP         | B     | 481        | 3.63                  | 108.80       | 179.60         |
| 1KHU     | SG     | CYS         | C     | 310        | OD1    | ASP         | C     | 297        | 3.14                  | 122.60       | 18.40          |
| 1KHU     | SG     | CYS         | D     | 310        | OD1    | ASP         | D     | 297        | 3.15                  | 120.20       | 15.80          |
| 1KNW     | SG     | CYS         | A     | 26         | OD2    | ASP         | A     | 299        | 3.50                  | 109.90       | 0.20           |
| 1KYA     | SG     | CYS         | A     | 117        | OD1    | ASP         | A     | 456        | 3.66                  | 105.80       | 163.40         |
| 1KYA     | SG     | CYS         | B     | 117        | OD1    | ASP         | B     | 456        | 3.66                  | 105.50       | 162.70         |
| 1KYA     | SG     | CYS         | C     | 117        | OD1    | ASP         | C     | 456        | 3.67                  | 106.00       | 164.00         |
| 1KYA     | SG     | CYS         | D     | 117        | OD1    | ASP         | D     | 456        | 3.57                  | 107.90       | 162.90         |
| 1L6J     | SG     | CYS         | A     | 99         | OE1    | GLU         | A     | 402        | 2.95                  | 121.10       | 17.40          |

|      |    |      |   |      |     |     |   |      |      |        |         |
|------|----|------|---|------|-----|-----|---|------|------|--------|---------|
| 1LP3 | SG | CYS  | A | 224  | OD2 | ASP | A | 146  | 2.80 | 104.10 | 17.90   |
| 1MKM | SG | CYS  | B | 196  | OD2 | ASP | B | 186  | 3.73 | 116.00 | -164.90 |
| 1N82 | SG | CYS  | A | 182  | OE2 | GLU | A | 181  | 3.27 | 120.60 | 165.90  |
| 1N82 | SG | BCYS | B | 1182 | OE2 | GLU | B | 1181 | 2.97 | 124.40 | 167.30  |
| 1NEK | SG | CYS  | B | 75   | OD2 | ASP | B | 63   | 3.17 | 122.70 | -14.80  |
| 1NFG | SG | CYS  | A | 240  | OE2 | GLU | A | 242  | 3.91 | 97.50  | -165.10 |
| 1NFG | SG | CYS  | B | 240  | OE2 | GLU | B | 242  | 3.91 | 97.50  | -165.10 |
| 1NFG | SG | CYS  | C | 240  | OE2 | GLU | C | 242  | 3.91 | 97.50  | -165.10 |
| 1NFG | SG | CYS  | D | 240  | OE2 | GLU | D | 242  | 3.91 | 97.50  | -165.00 |
| 1NOZ | SG | CYS  | B | 169  | OE2 | GLU | B | 170  | 3.18 | 97.40  | 179.20  |
| 1NSC | SG | CYS  | A | 86   | OD2 | ASP | A | 416  | 3.96 | 101.30 | 175.00  |
| 1NSC | SG | CYS  | B | 86   | OD2 | ASP | B | 416  | 3.96 | 102.30 | 175.90  |
| 1O7F | SG | CYS  | A | 18   | OD1 | ASP | A | 30   | 3.46 | 107.90 | 161.50  |
| 1OHF | SG | CYS  | B | 552  | OD2 | ASP | C | 548  | 3.46 | 113.00 | 11.20   |
| 1OI4 | SG | CYS  | B | 325  | OE2 | GLU | B | 238  | 3.49 | 112.50 | 11.40   |
| 1OR8 | SG | CYS  | A | 85   | OD1 | ASP | A | 76   | 3.47 | 105.80 | -170.40 |
| 1OUO | SG | CYS  | A | 93   | OD1 | ASP | A | 106  | 3.43 | 105.10 | -169.00 |
| 1P35 | SG | CYS  | B | 266  | OE2 | GLU | B | 79   | 3.89 | 96.50  | 170.00  |
| 1P35 | SG | CYS  | C | 266  | OE2 | GLU | C | 79   | 3.96 | 104.60 | 164.00  |
| 1PDU | SG | CYS  | B | 339  | OD1 | ASP | B | 336  | 3.85 | 96.30  | -19.80  |
| 1PGS | SG | CYS  | A | 231  | OD1 | ASP | A | 247  | 3.66 | 123.90 | -174.10 |
| 1QDM | SG | CYS  | A | 37S  | OE1 | GLU | A | 73S  | 3.53 | 124.00 | 160.00  |
| 1QH4 | SG | CYS  | A | 141  | OE2 | GLU | A | 150  | 3.41 | 106.20 | -6.00   |
| 1QH4 | SG | CYS  | B | 141  | OE2 | GLU | B | 150  | 3.47 | 102.10 | -5.20   |
| 1QH4 | SG | CYS  | C | 141  | OE2 | GLU | C | 150  | 3.42 | 107.20 | -4.30   |
| 1QH4 | SG | CYS  | D | 141  | OE2 | GLU | D | 150  | 3.40 | 105.90 | -4.00   |
| 1QJ4 | SG | CYS  | A | 161  | OD2 | ASP | A | 234  | 3.36 | 116.10 | 8.30    |
| 1QUB | SG | CYS  | A | 306  | OE2 | GLU | A | 292  | 3.41 | 103.60 | 160.90  |
| 1R9D | SG | CYS  | A | 26   | OE2 | GLU | A | 28   | 3.85 | 108.00 | -165.30 |
| 1R9D | SG | CYS  | B | 26   | OE2 | GLU | B | 28   | 3.93 | 105.10 | -166.90 |
| 1RQB | SG | CYS  | A | 216  | OD2 | ASP | A | 185  | 3.77 | 113.80 | 179.50  |
| 1RW7 | SG | CYS  | A | 138  | OE2 | GLU | A | 30   | 3.23 | 116.50 | 17.70   |
| 1RZU | SG | CYS  | A | 57   | OE1 | GLU | A | 72   | 3.40 | 116.50 | -167.90 |
| 1S3G | SG | CYS  | A | 130  | OD1 | ASP | A | 153  | 3.19 | 116.70 | -6.40   |
| 1S4E | SG | CYS  | A | 282  | OE2 | GLU | A | 284  | 3.60 | 112.40 | -163.50 |
| 1S4E | SG | CYS  | B | 282  | OE2 | GLU | B | 284  | 3.49 | 109.20 | -170.80 |
| 1S4E | SG | CYS  | E | 282  | OE2 | GLU | E | 284  | 3.38 | 113.50 | -168.10 |
| 1S4E | SG | CYS  | F | 282  | OE2 | GLU | F | 284  | 3.33 | 117.80 | -166.50 |
| 1S4E | SG | CYS  | H | 282  | OE2 | GLU | H | 284  | 3.54 | 111.80 | -167.50 |
| 1S6Y | SG | CYS  | A | 172  | OE2 | GLU | A | 358  | 3.85 | 119.80 | 2.50    |
| 1SI5 | SG | CYS  | H | 561  | OD1 | ASP | H | 558  | 3.98 | 113.90 | 173.40  |
| 1SVV | SG | CYS  | B | 51   | OD1 | ASP | B | 48   | 3.33 | 120.10 | -19.10  |
| 1SVV | SG | CYS  | A | 51   | OD2 | ASP | A | 48   | 3.26 | 113.10 | -16.50  |
| 1TJO | SG | CYS  | C | 30   | OD1 | ASP | C | 145  | 3.64 | 116.90 | -162.10 |
| 1TJO | SG | CYS  | D | 30   | OD1 | ASP | D | 145  | 3.64 | 120.80 | -160.90 |
| 1U1J | SG | CYS  | A | 636  | OD2 | ASP | A | 409  | 3.79 | 116.70 | -170.80 |
| 1U6K | SG | CYS  | A | 48   | OD1 | ASP | A | 45   | 3.23 | 109.10 | -17.20  |
| 1ULZ | SG | CYS  | A | 228  | OE1 | GLU | A | 295  | 3.49 | 122.00 | -167.80 |
| 1V10 | SG | CYS  | A | 117  | OD1 | ASP | A | 455  | 3.17 | 111.40 | 172.30  |
| 1VPR | SG | CYS  | A | 972  | OE1 | GLU | A | 1141 | 3.82 | 106.40 | -175.10 |
| 1VQ2 | SG | CYS  | A | 19   | OE1 | GLU | A | 102  | 3.73 | 97.70  | 15.10   |
| 1VQ2 | SG | CYS  | A | 19   | OE2 | GLU | A | 102  | 3.65 | 102.20 | -15.70  |
| 1W07 | SG | ACYS | B | 376  | OE2 | GLU | B | 372  | 3.56 | 123.10 | 172.60  |

|      |    |      |   |     |     |     |   |     |      |        |         |
|------|----|------|---|-----|-----|-----|---|-----|------|--------|---------|
| 1WN0 | SG | CYS  | A | 105 | OD1 | ASP | A | 76  | 3.73 | 112.70 | -171.20 |
| 1XFK | SG | CYS  | A | 52  | OE2 | GLU | A | 128 | 3.58 | 118.70 | 166.70  |
| 1XG2 | SG | CYS  | B | 114 | OD2 | ASP | B | 132 | 3.41 | 110.90 | -15.80  |
| 1XKL | SG | CYS  | A | 164 | OD2 | ASP | A | 237 | 3.13 | 112.20 | 5.90    |
| 1XKL | SG | CYS  | B | 164 | OD2 | ASP | B | 237 | 3.18 | 116.20 | -2.00   |
| 1XKL | SG | CYS  | C | 164 | OD2 | ASP | C | 237 | 3.18 | 113.80 | 2.20    |
| 1XKL | SG | CYS  | D | 164 | OD2 | ASP | D | 237 | 3.16 | 111.10 | 0.10    |
| 1Y1N | SG | CYS  | A | 104 | OD1 | ASP | A | 78  | 3.49 | 110.60 | 170.30  |
| 1YM3 | SG | CYS  | A | 107 | OD1 | ASP | A | 53  | 3.87 | 108.00 | 11.50   |
| 1YO8 | SG | CYS  | A | 799 | OE2 | GLU | A | 795 | 3.96 | 104.80 | 166.70  |
| 1YOX | SG | CYS  | A | 179 | OD2 | ASP | A | 176 | 3.44 | 118.30 | -176.30 |
| 1YOX | SG | CYS  | E | 179 | OD2 | ASP | E | 176 | 3.96 | 103.80 | 174.50  |
| 1YRL | SG | CYS  | C | 156 | OE2 | GLU | C | 160 | 3.37 | 112.60 | -178.60 |
| 1Z08 | SG | CYS  | A | 29  | OD1 | ASP | A | 100 | 3.52 | 110.70 | -161.70 |
| 1Z08 | SG | CYS  | B | 29  | OD1 | ASP | B | 100 | 3.59 | 109.00 | -162.10 |
| 1Z08 | SG | CYS  | D | 29  | OD1 | ASP | D | 100 | 3.60 | 112.30 | -162.70 |
| 2A1F | SG | CYS  | D | 170 | OD2 | ASP | D | 169 | 3.97 | 109.00 | -179.60 |
| 2AB0 | SG | BCYS | A | 106 | OE2 | GLU | A | 17  | 3.02 | 116.70 | 12.90   |
| 2AB0 | SG | ACYS | B | 106 | OE2 | GLU | B | 17  | 3.01 | 116.10 | 13.50   |
| 2B34 | SG | CYS  | C | 114 | OE2 | GLU | C | 110 | 3.17 | 109.70 | 164.30  |
| 2B3H | SG | CYS  | A | 202 | OD1 | ASP | A | 176 | 3.56 | 115.70 | 166.50  |
| 2C1X | SG | CYS  | A | 368 | OE2 | GLU | A | 383 | 3.90 | 114.20 | -163.50 |
| 2CMZ | SG | CYS  | A | 224 | OE1 | GLU | A | 138 | 3.80 | 119.60 | -160.00 |
| 2D0V | SG | CYS  | A | 103 | OE2 | GLU | A | 177 | 3.77 | 123.50 | -171.00 |
| 2D2M | SG | CYS  | D | 2   | OE2 | GLU | D | 1   | 3.61 | 111.90 | -174.60 |
| 2DJF | SG | CYS  | C | 424 | OE2 | GLU | C | 423 | 3.65 | 122.00 | -161.30 |
| 2DSC | SG | CYS  | A | 131 | OD1 | ASP | B | 194 | 3.90 | 111.40 | 160.70  |
| 2E11 | SG | CYS  | A | 130 | OE2 | GLU | A | 159 | 3.23 | 123.00 | -6.60   |
| 2E11 | SG | CYS  | B | 130 | OE2 | GLU | B | 159 | 3.20 | 124.10 | -7.60   |
| 2E11 | SG | CYS  | D | 130 | OE2 | GLU | D | 159 | 3.44 | 118.30 | -6.50   |
| 2EA9 | SG | CYS  | A | 82  | OE1 | GLU | A | 93  | 3.98 | 117.30 | -167.70 |
| 2EER | SG | CYS  | A | 112 | OE2 | GLU | A | 98  | 3.58 | 99.60  | -166.00 |
| 2EER | SG | CYS  | B | 112 | OE2 | GLU | B | 98  | 3.77 | 98.30  | -171.60 |
| 2ETL | SG | CYS  | B | 152 | OE2 | GLU | B | 7   | 3.08 | 107.40 | -165.30 |
| 2EZ9 | SG | CYS  | A | 475 | OD1 | ASP | A | 499 | 3.90 | 103.80 | 174.50  |
| 2EZ9 | SG | CYS  | B | 475 | OD1 | ASP | B | 499 | 3.95 | 104.00 | 174.90  |
| 2FEX | SG | CYS  | A | 101 | OE2 | GLU | A | 16  | 3.17 | 121.50 | 13.50   |
| 2FEX | SG | CYS  | C | 101 | OE2 | GLU | C | 16  | 3.22 | 121.70 | 17.90   |
| 2FUV | SG | ACYS | B | 519 | OE2 | GLU | B | 532 | 3.85 | 95.30  | 170.20  |
| 2G50 | SG | CYS  | A | 473 | OD2 | ASP | A | 475 | 3.27 | 118.00 | -161.80 |
| 2G50 | SG | CYS  | G | 473 | OD2 | ASP | G | 475 | 3.40 | 117.90 | -169.70 |
| 2G50 | SG | CYS  | H | 473 | OD2 | ASP | H | 475 | 3.42 | 116.00 | -165.00 |
| 2GE3 | SG | CYS  | C | 86  | OE2 | GLU | C | 123 | 3.96 | 116.10 | 19.10   |
| 2GEL | SG | CYS  | G | 13  | OE1 | GLU | G | 28  | 3.73 | 106.30 | 174.30  |
| 2GJ2 | SG | CYS  | A | 46  | OE1 | GLU | D | 31  | 3.20 | 103.90 | 3.80    |
| 2GJ2 | SG | CYS  | B | 46  | OE1 | GLU | C | 31  | 3.55 | 114.00 | 4.10    |
| 2GJ2 | SG | CYS  | C | 46  | OE1 | GLU | B | 31  | 3.13 | 123.50 | 2.90    |
| 2GJ2 | SG | CYS  | D | 46  | OE1 | GLU | A | 31  | 2.90 | 104.40 | -8.30   |
| 2GL6 | SG | CYS  | A | 238 | OD1 | ASP | A | 96  | 3.69 | 101.50 | -169.60 |
| 2GL6 | SG | CYS  | B | 238 | OD1 | ASP | B | 96  | 3.46 | 104.80 | -170.70 |
| 2GL6 | SG | CYS  | C | 238 | OD1 | ASP | C | 96  | 3.59 | 108.10 | -166.90 |
| 2GL6 | SG | CYS  | D | 238 | OD1 | ASP | D | 96  | 3.41 | 112.60 | -173.50 |
| 2GL6 | SG | CYS  | F | 238 | OD1 | ASP | F | 96  | 3.56 | 102.00 | -163.10 |

|      |    |      |   |      |     |      |   |      |      |        |         |
|------|----|------|---|------|-----|------|---|------|------|--------|---------|
| 2GL6 | SG | CYS  | G | 238  | OD1 | ASP  | G | 96   | 3.57 | 106.40 | -172.70 |
| 2GL6 | SG | CYS  | H | 238  | OD1 | ASP  | H | 96   | 3.99 | 95.70  | -163.50 |
| 2GYQ | SG | CYS  | A | 79   | OE1 | GLU  | B | 88   | 3.41 | 123.30 | 14.10   |
| 2GYQ | SG | CYS  | B | 79   | OE1 | AGLU | A | 88   | 3.21 | 106.00 | 7.60    |
| 2GYQ | SG | CYS  | B | 79   | OE2 | AGLU | A | 88   | 3.38 | 95.00  | -7.00   |
| 2H0Q | SG | CYS  | A | 374  | OE1 | GLU  | A | 603  | 3.81 | 117.10 | 165.90  |
| 2H4C | SG | CYS  | C | 29   | OD1 | ASP  | C | 42   | 3.69 | 120.50 | 170.90  |
| 2H4C | SG | CYS  | H | 29   | OD1 | ASP  | H | 42   | 3.92 | 115.20 | -174.70 |
| 2H5E | SG | CYS  | B | 175  | OD1 | ASP  | B | 147  | 3.99 | 118.90 | 167.90  |
| 2H5U | SG | CYS  | A | 117  | OD1 | ASP  | A | 456  | 3.48 | 107.20 | 172.60  |
| 2H63 | SG | CYS  | C | 74   | OE2 | GLU  | C | 97   | 3.32 | 122.40 | -163.60 |
| 2H63 | SG | CYS  | D | 74   | OE2 | GLU  | D | 97   | 3.67 | 119.20 | 164.30  |
| 2HDY | SG | CYS  | A | 359  | OE1 | GLU  | A | 331  | 3.12 | 113.60 | 179.90  |
| 2HDY | SG | CYS  | B | 359  | OE1 | GLU  | B | 331  | 3.28 | 106.30 | -172.00 |
| 2HFK | SG | CYS  | B | 48   | OE1 | GLU  | B | 50   | 3.98 | 106.00 | -166.50 |
| 2HL0 | SG | CYS  | A | 127  | OE2 | GLU  | A | 134  | 3.69 | 104.90 | -162.20 |
| 2HR7 | SG | CYS  | B | 8    | OE2 | GLU  | B | 6    | 3.44 | 111.90 | -178.90 |
| 2HRC | SG | CYS  | A | 360  | OE2 | GLU  | A | 324  | 3.07 | 103.90 | -176.10 |
| 2HRG | SG | BCYS | A | 117  | OD2 | ASP  | A | 453  | 3.66 | 111.00 | 170.70  |
| 2HZH | SG | CYS  | A | 117  | OD2 | ASP  | A | 456  | 3.95 | 104.80 | 179.00  |
| 2IV2 | SG | ACYS | X | 588  | OD2 | ASP  | X | 404  | 3.49 | 120.60 | 169.00  |
| 2J1G | SG | CYS  | A | 232  | OD1 | ASP  | A | 226  | 3.36 | 108.30 | 178.90  |
| 2JDQ | SG | CYS  | A | 203  | OD2 | ASP  | A | 199  | 3.60 | 113.60 | -167.40 |
| 2JFK | SG | CYS  | C | 593  | OD2 | ASP  | C | 591  | 3.32 | 122.60 | 171.90  |
| 2NPI | SG | CYS  | A | 87   | OD1 | ASP  | A | 89   | 3.83 | 104.00 | -168.50 |
| 2NTE | SG | CYS  | B | 743  | OE1 | GLU  | B | 740  | 3.90 | 114.30 | 176.30  |
| 2NYT | SG | CYS  | A | 131  | OE1 | GLU  | A | 60   | 3.65 | 123.20 | -11.60  |
| 2NYT | SG | CYS  | C | 131  | OE1 | GLU  | C | 60   | 3.68 | 121.60 | -10.40  |
| 2O1S | SG | CYS  | B | 330  | OE1 | GLU  | B | 354  | 3.76 | 118.00 | -163.60 |
| 2O2P | SG | ACYS | A | 707  | OE1 | GLU  | A | 673  | 3.85 | 96.60  | -0.60   |
| 2O2P | SG | ACYS | B | 707  | OE1 | GLU  | B | 673  | 3.79 | 97.90  | 0.80    |
| 2O2P | SG | ACYS | C | 707  | OE1 | GLU  | C | 673  | 3.93 | 96.50  | 2.80    |
| 2O2P | SG | ACYS | D | 707  | OE1 | GLU  | D | 673  | 3.78 | 99.80  | 1.30    |
| 2O2P | SG | ACYS | A | 707  | OE2 | GLU  | A | 673  | 3.64 | 106.80 | 0.70    |
| 2O2P | SG | ACYS | B | 707  | OE2 | GLU  | B | 673  | 3.64 | 105.60 | -0.90   |
| 2O2P | SG | ACYS | C | 707  | OE2 | GLU  | C | 673  | 3.71 | 107.50 | -3.10   |
| 2O2P | SG | ACYS | D | 707  | OE2 | GLU  | D | 673  | 3.70 | 104.10 | -1.40   |
| 2O55 | SG | CYS  | A | 49   | OE2 | GLU  | A | 53   | 3.31 | 112.00 | -164.90 |
| 2OME | SG | CYS  | A | 124  | OE2 | GLU  | A | 340  | 3.49 | 114.90 | -166.30 |
| 2OME | SG | CYS  | H | 124  | OE2 | GLU  | H | 340  | 3.48 | 112.50 | -174.70 |
| 2O04 | SG | CYS  | A | 1496 | OD2 | ASP  | A | 1492 | 3.93 | 118.90 | 163.00  |
| 2O04 | SG | CYS  | A | 1534 | OD2 | ASP  | A | 1530 | 3.83 | 118.20 | 169.70  |
| 2O04 | SG | CYS  | B | 1496 | OE2 | GLU  | B | 1482 | 3.35 | 114.80 | 160.80  |
| 2O07 | SG | CYS  | A | 130  | OD1 | ASP  | A | 153  | 3.28 | 116.20 | -10.40  |
| 2O07 | SG | CYS  | B | 130  | OD1 | ASP  | B | 153  | 3.30 | 115.20 | -15.00  |
| 2OY0 | SG | CYS  | B | 88   | OD1 | ASP  | B | 79   | 3.67 | 110.00 | -172.40 |
| 2OY9 | SG | CYS  | B | 73   | OE2 | GLU  | B | 66   | 3.62 | 123.30 | -168.80 |
| 2P0I | SG | CYS  | A | 190  | OD2 | ASP  | A | 192  | 3.61 | 107.40 | -167.50 |
| 2P26 | SG | CYS  | A | 398  | OE2 | GLU  | A | 16   | 3.54 | 106.80 | 167.20  |
| 2P2W | SG | CYS  | A | 17   | OE2 | GLU  | A | 175  | 3.75 | 112.10 | -169.10 |
| 2PLW | SG | CYS  | A | 37   | OD2 | ASP  | A | 28   | 3.29 | 124.40 | 172.60  |
| 2POZ | SG | CYS  | C | 383  | OE2 | GLU  | C | 57   | 3.66 | 104.30 | 174.40  |
| 2POZ | SG | CYS  | G | 383  | OE2 | GLU  | G | 57   | 3.93 | 102.30 | 161.40  |

|      |    |      |   |     |     |     |   |     |      |        |         |
|------|----|------|---|-----|-----|-----|---|-----|------|--------|---------|
| 2QBX | SG | CYS  | A | 105 | OE2 | GLU | A | 117 | 3.88 | 102.60 | 168.50  |
| 2QBX | SG | CYS  | B | 105 | OE2 | GLU | B | 117 | 3.46 | 101.60 | 163.40  |
| 2QH9 | SG | CYS  | B | 18  | OD2 | ASP | B | 11  | 3.94 | 110.10 | 162.40  |
| 2QT3 | SG | CYS  | A | 300 | OE2 | GLU | A | 324 | 3.58 | 116.80 | 177.80  |
| 2QT3 | SG | CYS  | B | 300 | OE2 | GLU | B | 324 | 3.61 | 118.40 | 177.20  |
| 2QZU | SG | CYS  | A | 158 | OD2 | ASP | A | 136 | 3.40 | 119.50 | -18.60  |
| 2RDL | SG | CYS  | A | 22  | OE2 | GLU | A | 157 | 3.24 | 103.20 | 165.00  |
| 2RK3 | SG | CYS  | A | 106 | OE2 | GLU | A | 18  | 3.28 | 110.30 | 15.00   |
| 2TOD | SG | CYS  | A | 135 | OD2 | ASP | A | 137 | 3.41 | 118.90 | -169.20 |
| 2TOD | SG | CYS  | B | 135 | OD2 | ASP | B | 137 | 3.37 | 116.20 | 177.50  |
| 2TOD | SG | CYS  | C | 135 | OD2 | ASP | C | 137 | 3.31 | 116.10 | 178.10  |
| 2TOD | SG | CYS  | D | 135 | OD2 | ASP | D | 137 | 3.28 | 123.30 | -176.20 |
| 2UX0 | SG | CYS  | D | 518 | OE2 | GLU | D | 500 | 3.52 | 123.00 | -167.50 |
| 2UX0 | SG | CYS  | F | 518 | OE2 | GLU | F | 500 | 3.67 | 113.80 | -169.40 |
| 2V3V | SG | CYS  | A | 350 | OE1 | GLU | A | 156 | 3.54 | 106.30 | 11.40   |
| 2V3V | SG | CYS  | A | 350 | OE2 | GLU | A | 156 | 3.75 | 95.90  | -10.30  |
| 2V90 | SG | CYS  | B | 323 | OE2 | GLU | B | 253 | 3.79 | 103.60 | -165.20 |
| 2ZBA | SG | CYS  | A | 298 | OE1 | GLU | A | 296 | 3.75 | 109.60 | -166.10 |
| 3B89 | SG | CYS  | A | 20  | OD2 | ASP | A | 22  | 3.88 | 103.20 | 174.40  |
| 3B98 | SG | CYS  | B | 348 | OE1 | GLU | B | 354 | 3.96 | 111.70 | -164.90 |
| 3BGE | SG | BCYS | A | 319 | OE2 | GLU | A | 327 | 2.91 | 96.70  | -178.10 |
| 3BRU | SG | CYS  | A | 125 | OE2 | GLU | A | 187 | 3.12 | 113.90 | -9.70   |
| 3BRU | SG | CYS  | B | 125 | OE2 | GLU | B | 187 | 3.06 | 118.50 | -2.10   |
| 3BV6 | SG | CYS  | D | 45  | OD2 | ASP | D | 121 | 3.54 | 119.10 | 171.80  |
| 3BV6 | SG | CYS  | F | 45  | OD2 | ASP | F | 121 | 3.61 | 116.60 | 163.40  |
| 3C8X | SG | CYS  | A | 105 | OE2 | GLU | A | 117 | 3.86 | 97.40  | -170.20 |

**Table S2:** Candidate D/E-C dyads in the 4/15/08 release of the PDB. A search for all potential D/E-C candidate dyads was performed on the 11,765 non-redundant crystal structures determined at 3.0 Å or better in the 4/15/08 release of the PDB. This search required that at least one carboxylic acid oxygen from aspartic or glutamic acid be within 4.0 Å of the sulfur atom of cysteine, that the C( $\delta/\gamma$ )-O( $\delta/\epsilon;1/2$ )-S $\gamma$  hydrogen bond angle be  $109.5\pm 15^\circ$ , and that the O( $\delta/\epsilon;1/2$ )-C( $\delta/\gamma$ )-O( $\delta/\epsilon;1/2$ )-S $\gamma$  dihedral angle be either  $0\pm 20^\circ$  or  $180\pm 20^\circ$ . Each identified interaction is tabulated above, including multiple instances of such interactions in the same set of coordinates.
